# Supplementary material
Source: PubMed Central journal article supplement (PMC4456438)
Supplement: MCB.01297-14_zmb999100872so1.pdf [file MCB.01297-14_zmb999100872so1.pdf]

Predicted targets of miR-133

| Gene product | Reference        | Reference       | Direct annotation |                                                                    |                      |
|--------------|------------------|-----------------|-------------------|--------------------------------------------------------------------|----------------------|
| Aif1l        | GO:0070062       | MGI:MGI:4834177 | GO REF:0000096    | extracellular vesicular exosome                                    |                      |
| Aif1l        | GO:0003779       | MGI:MGI:1354194 | GO REF:0000004    | actin binding                                                      |                      |
| Aif1l        | GO:0008150       | MGI:MGI:2156816 | GO REF:0000015    | biological process                                                 |                      |
| Aif1l        | GO:0005856       | MGI:MGI:1354194 | GO REF:0000004    | cytoskeleton                                                       |                      |
| Aif1l        | GO:0005886       | MGI:MGI:1354194 | GO REF:0000004    | plasma membrane                                                    |                      |
| Aif1l        | GO:0015629       | MGI:MGI:4834177 | GO REF:0000096    | actin cytoskeleton                                                 |                      |
| Aif1l        | GO:0042995       | MGI:MGI:1354194 | GO REF:0000004    | cell projection                                                    |                      |
| Aif1l        | GO:0005509       | MGI:MGI:2152098 | GO REF:0000002    | calcium ion binding                                                |                      |
| Aif1l        | GO:0051015       | MGI:MGI:4834177 | GO REF:0000096    | actin filament binding                                             |                      |
| Aif1l        | GO:0016020       | MGI:MGI:1354194 | GO REF:0000004    | membrane                                                           |                      |
| Aif1l        | GO:0005737       | MGI:MGI:1354194 | GO REF:0000004    | cytoplasm                                                          |                      |
| Aif1l        | colocalizes with | GO:0005884      | MGI:MGI:4834177   | GO REF:0000096                                                     | actin filament       |
| Aif1l        | GO:0046872       | MGI:MGI:1354194 | GO REF:0000004    | metal ion binding                                                  |                      |
| Aif1l        | GO:0005925       | MGI:MGI:4834177 | GO REF:0000096    | focal adhesion                                                     |                      |
| Aif1l        | GO:0043234       | MGI:MGI:4417868 | GO REF:0000096    | protein complex                                                    |                      |
| Atp6ap2      | GO:0060323       | MGI:MGI:4834177 | GO REF:0000096    | head morphogenesis                                                 |                      |
| Atp6ap2      | GO:0020003       | MGI:MGI:4417868 | GO REF:0000096    | angiotensin maturation                                             |                      |
| Atp6ap2      | GO:0009897       | MGI:MGI:4834177 | GO REF:0000096    | external side of plasma membrane                                   |                      |
| Atp6ap2      | GO:0044297       | MGI:MGI:4417868 | GO REF:0000096    | cell body                                                          |                      |
| Atp6ap2      | GO:0004872       | MGI:MGI:2152098 | GO REF:0000002    | receptor activity                                                  |                      |
| Atp6ap2      | GO:0006508       | MGI:MGI:4834177 | GO REF:0000096    | proteolysis                                                        |                      |
| Atp6ap2      | GO:0016021       | MGI:MGI:1354194 | GO REF:0000004    | integral component of membrane                                     |                      |
| Atp6ap2      | GO:0043408       | MGI:MGI:4834177 | GO REF:0000096    | regulation of MAPK cascade                                         |                      |
| Atp6ap2      | GO:0030177       | MGI:MGI:4421218 | PMID:20093472     | positive regulation of Wnt signaling pathway                       |                      |
| Atp6ap2      | GO:0021903       | MGI:MGI:4834177 | GO REF:0000096    | rostrocaudal neural tube patterning                                |                      |
| Atp6ap2      | GO:0002003       | MGI:MGI:4834177 | GO REF:0000096    | angiotensin maturation                                             |                      |
| Atp6ap2      | GO:0004190       | MGI:MGI:4834177 | GO REF:0000096    | aspartic-type endopeptidase activity                               |                      |
| Atp6ap2      | GO:0043005       | MGI:MGI:4417868 | GO REF:0000096    | neuron projection                                                  |                      |
| Atp6ap2      | GO:0016020       | MGI:MGI:1354194 | GO REF:0000004    | membrane                                                           |                      |
| Atp6ap2      | GO:0019899       | MGI:MGI:4417868 | GO REF:0000096    | enzyme binding                                                     |                      |
| Atp6ap2      | GO:0030177       | MGI:MGI:4834177 | GO REF:0000096    | positive regulation of Wnt signaling pathway                       |                      |
| Atp6ap2      | GO:0048069       | MGI:MGI:4834177 | GO REF:0000096    | eye pigmentation                                                   |                      |
| Atp6ap2      | GO:0032914       | MGI:MGI:4834177 | GO REF:0000096    | positive regulation of transforming growth factor beta1 production |                      |
| Atp6ap2      | GO:0016021       | MGI:MGI:2152098 | GO REF:0000002    | integral component of membrane                                     |                      |
| Atp6ap2      | GO:0070062       | MGI:MGI:4834177 | GO REF:0000096    | extracellular vesicular exosome                                    |                      |
| Col8a1       | GO:0005604       | MGI:MGI:1354194 | GO REF:0000004    | basement membrane                                                  |                      |
| Col8a1       | GO:0005578       | MGI:MGI:1354194 | GO REF:0000004    | proteinaceous extracellular matrix                                 |                      |
| Col8a1       | GO:0001525       | MGI:MGI:1354194 | GO REF:0000004    | angiogenesis                                                       |                      |
| Col8a1       | GO:0043231       | MGI:MGI:4834177 | GO REF:0000096    | intracellular membrane-bounded organelle                           |                      |
| Col8a1       | GO:0007155       | MGI:MGI:1354194 | GO REF:0000004    | cell adhesion                                                      |                      |
| Col8a1       | GO:0005581       | MGI:MGI:1354194 | GO REF:0000004    | collagen trimer                                                    |                      |
| Col8a1       | GO:0010811       | MGI:MGI:3807344 | PMID:18757743     | positive regulation of cell-substrate adhesion                     |                      |
| Col8a1       | GO:0005576       | MGI:MGI:1354194 | GO REF:0000004    | extracellular region                                               |                      |
| Col8a1       | GO:0070062       | MGI:MGI:4834177 | GO REF:0000096    | extracellular vesicular exosome                                    |                      |
| Col8a1       | GO:00050673      | MGI:MGI:3587134 | PMID:16051690     | epithelial cell proliferation                                      |                      |
| Col8a1       | GO:0048593       | MGI:MGI:3587134 | PMID:16051690     | camera-type eye morphogenesis                                      |                      |
| Col8a1       | colocalizes with | GO:0031012      | MGI:MGI:4834177   | GO REF:0000096                                                     | extracellular matrix |
| Srgap3       | GO:0030336       | MGI:MGI:4459044 | GO REF:0000033    | negative regulation of cell migration                              |                      |
| Srgap3       | GO:0005622       | MGI:MGI:2152098 | GO REF:0000002    | intracellular                                                      |                      |
| Srgap3       | GO:0005515       | MGI:MGI:2152475 | PMID:11672528     | protein binding                                                    |                      |
| Srgap3       | GO:0030675       | MGI:MGI:4459044 | GO REF:0000033    | Rac GTPase activator activity                                      |                      |
| Srgap3       | GO:0007165       | MGI:MGI:2152098 | GO REF:0000002    | signal transduction                                                |                      |
| Srgap3       | GO:0005737       | MGI:MGI:4459044 | GO REF:0000033    | cytoplasm                                                          |                      |
| Srgap3       | GO:0005096       | MGI:MGI:1354194 | GO REF:0000004    | GTPase activator activity                                          |                      |
| Srgap3       | GO:0048365       | MGI:MGI:4459044 | GO REF:0000033    | Rac GTPase binding                                                 |                      |
| Srgap3       | GO:0032855       | MGI:MGI:4459044 | GO REF:0000033    | positive regulation of Rac GTPase activity                         |                      |
| Vat1         | GO:0055114       | MGI:MGI:1354194 | GO REF:0000004    | oxidation-reduction process                                        |                      |
| Vat1         | GO:0043883       | MGI:MGI:2152096 | GO REF:0000003    | malolactic enzyme activity                                         |                      |
| Vat1         | GO:0043826       | MGI:MGI:2152096 | GO REF:0000003    | sulfur oxygenase reductase activity                                |                      |
| Vat1         | GO:0016020       | MGI:MGI:1354194 | GO REF:0000004    | membrane                                                           |                      |
| Vat1         | GO:0016491       | MGI:MGI:2152098 | GO REF:0000002    | oxidoreductase activity                                            |                      |
| Vat1         | GO:0005741       | MGI:MGI:4417868 | GO REF:0000096    | mitochondrial outer membrane                                       |                      |
| Vat1         | GO:0070062       | MGI:MGI:4834177 | GO REF:0000096    | extracellular vesicular exosome                                    |                      |
| Vat1         | GO:0055114       | MGI:MGI:2152098 | GO REF:0000002    | oxidation-reduction process                                        |                      |
| Vat1         | GO:0043914       | MGI:MGI:2152096 | GO REF:0000003    | NADPH:sulfur oxidoreductase activity                               |                      |
| Vat1         | GO:0016491       | MGI:MGI:1354194 | GO REF:0000004    | oxidoreductase activity                                            |                      |
| Vat1         | GO:0043738       | MGI:MGI:2152096 | GO REF:0000003    | reduced coenzyme F420 dehydrogenase activity                       |                      |
| Vat1         | GO:0005739       | MGI:MGI:1354194 | GO REF:0000004    | mitochondrion                                                      |                      |
| Vat1         | GO:0008270       | MGI:MGI:2152098 | GO REF:0000002    | zinc ion binding                                                   |                      |
| Vat1         | GO:0010637       | MGI:MGI:4834177 | GO REF:0000096    | negative regulation of mitochondrial fusion                        |                      |
| Vat1         | GO:0005737       | MGI:MGI:1354194 | GO REF:0000004    | cytoplasm                                                          |                      |
| Vat1         | GO:0052693       | MGI:MGI:2152096 | GO REF:0000003    | epoxyqueuosine reductase activity                                  |                      |
| Vat1         | GO:0008748       | MGI:MGI:2152096 | GO REF:0000003    | N-ethylmaleimide reductase activity                                |                      |

Predicted targets of miR-1

| Gene product | Reference        | Reference       | Reference       | Direct annotation                               |               |
|--------------|------------------|-----------------|-----------------|-------------------------------------------------|---------------|
| Anxa2        | GO:0005811       | MGi:MGi:4834177 | GO REF:0000096  | lipid particle                                  |               |
| Anxa2        | GO:0001725       | MGi:MGi:2662669 | PMID:12611902   | stress fiber                                    |               |
| Anxa2        | GO:0051099       | MGi:MGi:3847621 | PMID:17690254   | positive regulation of binding                  |               |
| Anxa2        | GO:0005578       | MGi:MGi:1354194 | GO REF:0000004  | proteinaceous extracellular matrix              |               |
| Anxa2        | GO:0004859       | MGi:MGi:2152098 | GO REF:0000002  | phospholipase inhibitor activity                |               |
| Anxa2        | GO:0016020       | MGi:MGi:4834177 | GO REF:0000096  | membrane                                        |               |
| Anxa2        | GO:0044354       | MGi:MGi:4417868 | GO REF:0000096  | macropinosome                                   |               |
| Anxa2        | GO:0009986       | MGi:MGi:4834177 | GO REF:0000096  | cell surface                                    |               |
| Anxa2        | GO:0030496       | MGi:MGi:4834177 | GO REF:0000096  | midbody                                         |               |
| Anxa2        | GO:0017137       | MGi:MGi:4417868 | GO REF:0000096  | Rab GTPase binding                              |               |
| Anxa2        | colocalizes with | GO:0045121      | MGi:MGi:4834177 | GO REF:0000096                                  | membrane raft |
| Anxa2        | GO:0005886       | MGi:MGi:4417868 | GO REF:0000096  | plasma membrane                                 |               |
| Anxa2        | GO:0005546       | MGi:MGi:4834177 | GO REF:0000096  | phosphatidylinositol-4,5-bisphosphate binding   |               |
| Anxa2        | GO:0005938       | MGi:MGi:4417868 | GO REF:0000096  | cell cortex                                     |               |
| Anxa2        | GO:0005886       | MGi:MGi:4834177 | GO REF:0000096  | plasma membrane                                 |               |
| Anxa2        | GO:0005768       | MGi:MGi:4834177 | GO REF:0000096  | endosome                                        |               |
| Anxa2        | GO:0005634       | MGi:MGi:4834177 | GO REF:0000096  | nucleus                                         |               |
| Anxa2        | GO:0005769       | MGi:MGi:3045820 | PMID:15078881   | early endosome                                  |               |
| Anxa2        | GO:0005737       | MGi:MGi:3045820 | PMID:15078881   | cytoplasm                                       |               |
| Anxa2        | GO:0072661       | MGi:MGi:4417868 | GO REF:0000096  | protein targeting to plasma membrane            |               |
| Anxa2        | GO:0071229       | MGi:MGi:3847621 | PMID:17690254   | cellular response to acid chemical              |               |
| Anxa2        | GO:0001726       | MGi:MGi:4417868 | GO REF:0000096  | ruffle                                          |               |
| Anxa2        | GO:0005546       | MGi:MGi:4417868 | GO REF:0000096  | phosphatidylinositol-4,5-bisphosphate binding   |               |
| Anxa2        | GO:0042730       | MGi:MGi:3027337 | PMID:14702107   | fibrinolysis                                    |               |
| Anxa2        | GO:0035749       | MGi:MGi:4441217 | PMID:20237282   | myelin sheath adaxonal region                   |               |
| Anxa2        | GO:0031340       | MGi:MGi:4834177 | GO REF:0000096  | positive regulation of vesicle fusion           |               |
| Anxa2        | GO:0048471       | MGi:MGi:4417868 | GO REF:0000096  | perinuclear region of cytoplasm                 |               |
| Anxa2        | GO:0001765       | MGi:MGi:4834177 | GO REF:0000096  | membrane raft assembly                          |               |
| Anxa2        | GO:0016020       | MGi:MGi:2662669 | PMID:12611902   | membrane                                        |               |
| Anxa2        | GO:0019897       | MGi:MGi:3847621 | PMID:17690254   | extrinsic component of plasma membrane          |               |
| Anxa2        | GO:0005544       | MGi:MGi:4834177 | GO REF:0000096  | calcium-dependent phospholipid binding          |               |
| Anxa2        | GO:0019834       | MGi:MGi:4834177 | GO REF:0000096  | phospholipase A2 inhibitor activity             |               |
| Anxa2        | GO:0031982       | MGi:MGi:4417868 | GO REF:0000096  | vesicle                                         |               |
| Anxa2        | GO:0036035       | MGi:MGi:4834177 | GO REF:0000096  | osteoclast development                          |               |
| Anxa2        | GO:0031902       | MGi:MGi:4834177 | GO REF:0000096  | late endosome membrane                          |               |
| Anxa2        | GO:0030054       | MGi:MGi:2662669 | PMID:12611902   | cell junction                                   |               |
| Anxa2        | GO:0043086       | MGi:MGi:4834177 | GO REF:0000096  | negative regulation of catalytic activity       |               |
| Anxa2        | GO:0043220       | MGi:MGi:4441217 | PMID:20237282   | Schmidt-Lanterman incisure                      |               |
| Anxa2        | GO:0005765       | MGi:MGi:4834177 | GO REF:0000096  | lysosomal membrane                              |               |
| Anxa2        | GO:0007589       | MGi:MGi:4417868 | GO REF:0000096  | body fluid secretion                            |               |
| Anxa2        | GO:0044548       | MGi:MGi:4834177 | GO REF:0000096  | S100 protein binding                            |               |
| Anxa2        | GO:0005515       | MGi:MGi:2683818 | PMID:14506282   | protein binding                                 |               |
| Anxa2        | GO:0044822       | MGi:MGi:4834177 | GO REF:0000096  | poly(A) RNA binding                             |               |
| Anxa2        | GO:0030199       | MGi:MGi:3027337 | PMID:14702107   | collagen fibril organization                    |               |
| Anxa2        | GO:0031982       | MGi:MGi:4834177 | GO REF:0000096  | vesicle                                         |               |
| Anxa2        | GO:0043234       | MGi:MGi:4417868 | GO REF:0000096  | protein complex                                 |               |
| Anxa2        | GO:0005604       | MGi:MGi:1354194 | GO REF:0000004  | basement membrane                               |               |
| Anxa2        | GO:0048306       | MGi:MGi:4834177 | GO REF:0000096  | calcium-dependent protein binding               |               |
| Anxa2        | GO:0001934       | MGi:MGi:4417868 | GO REF:0000096  | positive regulation of protein phosphorylation  |               |
| Anxa2        | GO:0006900       | MGi:MGi:4834177 | GO REF:0000096  | membrane budding                                |               |
| Anxa2        | GO:0048146       | MGi:MGi:4417868 | GO REF:0000096  | positive regulation of fibroblast proliferation |               |
| Anxa2        | GO:0005737       | MGi:MGi:4417868 | GO REF:0000096  | cytoplasm                                       |               |
| Anxa2        | GO:0005515       | MGi:MGi:5469743 | PMID:23415230   | protein binding                                 |               |
| Anxa2        | GO:0005576       | MGi:MGi:1354194 | GO REF:0000004  | extracellular region                            |               |
| Anxa2        | GO:0008092       | MGi:MGi:2152098 | GO REF:0000002  | cytoskeletal protein binding                    |               |
| Anxa2        | GO:0042383       | MGi:MGi:2683818 | PMID:14506282   | sarcolemma                                      |               |
| Anxa2        | GO:0001525       | MGi:MGi:3027337 | PMID:14702107   | angiogenesis                                    |               |
| Anxa2        | GO:0070062       | MGi:MGi:4834177 | GO REF:0000096  | extracellular vesicular exosome                 |               |
| Anxa2        | GO:0051290       | MGi:MGi:4834177 | GO REF:0000096  | protein heterotetramerization                   |               |
| Anxa2        | GO:0005615       | MGi:MGi:4834177 | GO REF:0000096  | extracellular space                             |               |
| Anxa2        | GO:0005509       | MGi:MGi:2152098 | GO REF:0000002  | calcium ion binding                             |               |

Predicted targets of miR-1

|       |  |            |                 |                |                                                                |
|-------|--|------------|-----------------|----------------|----------------------------------------------------------------|
| Anxa4 |  | GO:0016324 | MGi:MGi:2178719 | PMID:11923205  | apical plasma membrane                                         |
| Anxa4 |  | GO:0005634 | MGi:MGi:4834177 | GO REF:0000096 | nucleus                                                        |
| Anxa4 |  | GO:0005886 | MGi:MGi:4834177 | GO REF:0000096 | plasma membrane                                                |
| Anxa4 |  | GO:0070062 | MGi:MGi:4834177 | GO REF:0000096 | extracellular vesicular exosome                                |
| Anxa4 |  | GO:0006357 | MGi:MGi:4834177 | GO REF:0000096 | regulation of transcription from RNA polymerase II promoter    |
| Anxa4 |  | GO:0009986 | MGi:MGi:4834177 | GO REF:0000096 | cell surface                                                   |
| Anxa4 |  | GO:0048471 | MGi:MGi:4834177 | GO REF:0000096 | perinuclear region of cytoplasm                                |
| Anxa4 |  | GO:0012506 | MGi:MGi:4834177 | GO REF:0000096 | vesicle membrane                                               |
| Anxa4 |  | GO:0048306 | MGi:MGi:4834177 | GO REF:0000096 | calcium-dependent protein binding                              |
| Anxa4 |  | GO:0051059 | MGi:MGi:4834177 | GO REF:0000096 | NF-kappaB binding                                              |
| Anxa4 |  | GO:0042802 | MGi:MGi:4834177 | GO REF:0000096 | identical protein binding                                      |
| Anxa4 |  | GO:0001822 | MGi:MGi:2178719 | PMID:11923205  | kidney development                                             |
| Anxa4 |  | GO:0031965 | MGi:MGi:4834177 | GO REF:0000096 | nuclear membrane                                               |
| Anxa4 |  | GO:0005509 | MGi:MGi:4834177 | GO REF:0000096 | calcium ion binding                                            |
| Anxa4 |  | GO:0005737 | MGi:MGi:4834177 | GO REF:0000096 | cytoplasm                                                      |
| Anxa4 |  | GO:0032088 | MGi:MGi:4834177 | GO REF:0000096 | negative regulation of NF-kappaB transcription factor activity |
| Anxa4 |  | GO:2000483 | MGi:MGi:4834177 | GO REF:0000096 | negative regulation of interleukin-8 secretion                 |
| Anxa4 |  | GO:0005544 | MGi:MGi:4834177 | GO REF:0000096 | calcium-dependent phospholipid binding                         |

|         |  |            |                 |                |                                                                    |
|---------|--|------------|-----------------|----------------|--------------------------------------------------------------------|
| Atp6ap2 |  | GO:0060323 | MGi:MGi:4834177 | GO REF:0000096 | head morphogenesis                                                 |
| Atp6ap2 |  | GO:0002003 | MGi:MGi:4417868 | GO REF:0000096 | angiotensin maturation                                             |
| Atp6ap2 |  | GO:0009897 | MGi:MGi:4834177 | GO REF:0000096 | external side of plasma membrane                                   |
| Atp6ap2 |  | GO:0044297 | MGi:MGi:4417868 | GO REF:0000096 | cell body                                                          |
| Atp6ap2 |  | GO:0004872 | MGi:MGi:2152098 | GO REF:0000002 | receptor activity                                                  |
| Atp6ap2 |  | GO:0006508 | MGi:MGi:4834177 | GO REF:0000096 | proteolysis                                                        |
| Atp6ap2 |  | GO:0016021 | MGi:MGi:1354194 | GO REF:0000004 | integral component of membrane                                     |
| Atp6ap2 |  | GO:0043408 | MGi:MGi:4834177 | GO REF:0000096 | regulation of MAPK cascade                                         |
| Atp6ap2 |  | GO:0030177 | MGi:MGi:4421218 | PMID:20093472  | positive regulation of Wnt signaling pathway                       |
| Atp6ap2 |  | GO:0021903 | MGi:MGi:4834177 | GO REF:0000096 | rostrocaudal neural tube patterning                                |
| Atp6ap2 |  | GO:0002003 | MGi:MGi:4834177 | GO REF:0000096 | angiotensin maturation                                             |
| Atp6ap2 |  | GO:0004190 | MGi:MGi:4834177 | GO REF:0000096 | aspartic-type endopeptidase activity                               |
| Atp6ap2 |  | GO:0043005 | MGi:MGi:4417868 | GO REF:0000096 | neuron projection                                                  |
| Atp6ap2 |  | GO:0016020 | MGi:MGi:1354194 | GO REF:0000004 | membrane                                                           |
| Atp6ap2 |  | GO:0019899 | MGi:MGi:4417868 | GO REF:0000096 | enzyme binding                                                     |
| Atp6ap2 |  | GO:0030177 | MGi:MGi:4834177 | GO REF:0000096 | positive regulation of Wnt signaling pathway                       |
| Atp6ap2 |  | GO:0048069 | MGi:MGi:4834177 | GO REF:0000096 | eye pigmentation                                                   |
| Atp6ap2 |  | GO:0032914 | MGi:MGi:4834177 | GO REF:0000096 | positive regulation of transforming growth factor beta1 production |
| Atp6ap2 |  | GO:0016021 | MGi:MGi:2152098 | GO REF:0000002 | integral component of membrane                                     |
| Atp6ap2 |  | GO:0070062 | MGi:MGi:4834177 | GO REF:0000096 | extracellular vesicular exosome                                    |

Predicted targets of miR-1

|         |            |                 |                |                                                                                                |
|---------|------------|-----------------|----------------|------------------------------------------------------------------------------------------------|
| Atp6v1a | GO:0005902 | MGI:MGI:4943380 | PMID:18667600  | microvillus                                                                                    |
| Atp6v1a | GO:0015992 | MGI:MGI:1354194 | GO REF:0000004 | proton transport                                                                               |
| Atp6v1a | GO:0005765 | MGI:MGI:4834177 | GO REF:0000096 | lysosomal membrane                                                                             |
| Atp6v1a | GO:0005739 | MGI:MGI:2682130 | PMID:14651853  | mitochondrion                                                                                  |
| Atp6v1a | GO:0016324 | MGI:MGI:4943380 | PMID:18667600  | apical plasma membrane                                                                         |
| Atp6v1a | GO:0070062 | MGI:MGI:4834177 | GO REF:0000096 | extracellular vesicular exosome                                                                |
| Atp6v1a | GO:0033180 | MGI:MGI:2152098 | GO REF:0000002 | proton-transporting V-type ATPase, V1 domain                                                   |
| Atp6v1a | GO:0000166 | MGI:MGI:1354194 | GO REF:0000004 | nucleotide binding                                                                             |
| Atp6v1a | GO:0015991 | MGI:MGI:2152098 | GO REF:0000002 | ATP hydrolysis coupled proton transport                                                        |
| Atp6v1a | GO:0005524 | MGI:MGI:1354194 | GO REF:0000004 | ATP binding                                                                                    |
| Atp6v1a | GO:0006810 | MGI:MGI:1354194 | GO REF:0000004 | transport                                                                                      |
| Atp6v1a | GO:0005829 | MGI:MGI:3850618 | PMID:16177003  | cytosol                                                                                        |
| Atp6v1a | GO:0043209 | MGI:MGI:3834050 | PMID:17634366  | myelin sheath                                                                                  |
| Atp6v1a | GO:0016787 | MGI:MGI:1354194 | GO REF:0000004 | hydrolase activity                                                                             |
| Atp6v1a | GO:0033178 | MGI:MGI:2152098 | GO REF:0000002 | proton-transporting two-sector ATPase complex, catalytic domain                                |
| Atp6v1a | GO:0005524 | MGI:MGI:2152098 | GO REF:0000002 | ATP binding                                                                                    |
| Atp6v1a | GO:0046034 | MGI:MGI:2152098 | GO REF:0000002 | ATP metabolic process                                                                          |
| Atp6v1a | GO:0006811 | MGI:MGI:1354194 | GO REF:0000004 | ion transport                                                                                  |
| Atp6v1a | GO:0015992 | MGI:MGI:2152098 | GO REF:0000002 | proton transport                                                                               |
| Atp6v1a | GO:0005886 | MGI:MGI:3850618 | PMID:16177003  | plasma membrane                                                                                |
| Atp6v1a | GO:0048961 | MGI:MGI:2152098 | GO REF:0000002 | proton-transporting ATPase activity, rotational mechanism                                      |
| Atp6v1a | GO:0016820 | MGI:MGI:2152098 | GO REF:0000002 | hydrolase activity, acting on acid anhydrides, catalyzing transmembrane movement of substances |
| Azin1   | GO:0003824 | MGI:MGI:2152098 | GO REF:0000002 | catalytic activity                                                                             |
| Azin1   | GO:0006596 | MGI:MGI:2152098 | GO REF:0000002 | polyamine biosynthetic process                                                                 |
| Azin1   | GO:0042177 | MGI:MGI:4834177 | GO REF:0000096 | negative regulation of protein catabolic process                                               |
| Azin1   | GO:1902269 | MGI:MGI:3803410 | PMID:18508777  | positive regulation of polyamine transmembrane transport                                       |
| Azin1   | GO:0006596 | MGI:MGI:1354194 | GO REF:0000004 | polyamine biosynthetic process                                                                 |
| Azin1   | GO:0008073 | MGI:MGI:4417868 | GO REF:0000096 | ornithine decarboxylase inhibitor activity                                                     |
| Azin1   | GO:0042978 | MGI:MGI:3695330 | PMID:16916800  | ornithine decarboxylase activator activity                                                     |
| Azin1   | GO:0043086 | MGI:MGI:4417868 | GO REF:0000096 | negative regulation of catalytic activity                                                      |
| Azin1   | GO:0043085 | MGI:MGI:3695330 | PMID:16916800  | positive regulation of catalytic activity                                                      |
| Azin1   | GO:0042978 | MGI:MGI:4834177 | GO REF:0000096 | ornithine decarboxylase activator activity                                                     |
| Azin1   | GO:0006595 | MGI:MGI:1354413 | PMID:10698696  | polyamine metabolic process                                                                    |
| Azin1   | GO:1902269 | MGI:MGI:4834177 | GO REF:0000096 | positive regulation of polyamine transmembrane transport                                       |
| Azin1   | GO:0005634 | MGI:MGI:5582167 | PMID:19449338  | nucleus                                                                                        |
| Azin1   | GO:0043085 | MGI:MGI:4834177 | GO REF:0000096 | positive regulation of catalytic activity                                                      |

Predicted targets of miR-1

|        |            |                 |                |                                                                 |
|--------|------------|-----------------|----------------|-----------------------------------------------------------------|
| Coro1b | GO:0015629 | MGI:MGI:4459044 | GO REF:0000033 | actin cytoskeleton                                              |
| Coro1b | GO:0031529 | MGI:MGI:4834177 | GO REF:0000096 | ruffle organization                                             |
| Coro1b | GO:0005886 | MGI:MGI:4834177 | GO REF:0000096 | plasma membrane                                                 |
| Coro1b | GO:0034316 | MGI:MGI:4834177 | GO REF:0000096 | negative regulation of Arp2/3 complex-mediated actin nucleation |
| Coro1b | GO:0051015 | MGI:MGI:4459044 | GO REF:0000033 | actin filament binding                                          |
| Coro1b | GO:2000394 | MGI:MGI:4834177 | GO REF:0000096 | positive regulation of lamellipodium morphogenesis              |
| Coro1b | GO:0042060 | MGI:MGI:4834177 | GO REF:0000096 | wound healing                                                   |
| Coro1b | GO:0031252 | MGI:MGI:4834177 | GO REF:0000096 | cell leading edge                                               |
| Coro1b | GO:0070062 | MGI:MGI:4834177 | GO REF:0000096 | extracellular vesicular exosome                                 |
| Coro1b | GO:0090135 | MGI:MGI:4834177 | GO REF:0000096 | actin filament branching                                        |
| Coro1b | GO:0042802 | MGI:MGI:4834177 | GO REF:0000096 | identical protein binding                                       |
| Coro1b | GO:0016477 | MGI:MGI:4834177 | GO REF:0000096 | cell migration                                                  |
| Coro1b | GO:0003779 | MGI:MGI:1354194 | GO REF:0000004 | actin binding                                                   |
| Coro1b | GO:0030027 | MGI:MGI:4834177 | GO REF:0000096 | lamellipodium                                                   |
| Coro1b | GO:0071933 | MGI:MGI:4834177 | GO REF:0000096 | Arp2/3 complex binding                                          |
| Coro1b | GO:0001725 | MGI:MGI:4834177 | GO REF:0000096 | stress fiber                                                    |
| Coro1b | GO:0035767 | MGI:MGI:4834177 | GO REF:0000096 | endothelial cell chemotaxis                                     |
| Coro1b | GO:0051015 | MGI:MGI:4834177 | GO REF:0000096 | actin filament binding                                          |
| Coro1b | GO:1902463 | MGI:MGI:4834177 | GO REF:0000096 | protein localization to cell leading edge                       |
| Coro1b | GO:0005737 | MGI:MGI:4834177 | GO REF:0000096 | cytoplasm                                                       |
| Coro1b | GO:0005856 | MGI:MGI:1354194 | GO REF:0000004 | cytoskeleton                                                    |
| Coro1b | GO:0005925 | MGI:MGI:4834177 | GO REF:0000096 | focal adhesion                                                  |
| Coro1b | GO:0005515 | MGI:MGI:3818245 | PMID:18836449  | protein binding                                                 |
| Coro1b | GO:0030036 | MGI:MGI:4459044 | GO REF:0000033 | actin cytoskeleton organization                                 |
| Coro1b | GO:0051017 | MGI:MGI:4834177 | GO REF:0000096 | actin filament bundle assembly                                  |
| Coro1b | GO:0005884 | MGI:MGI:4834177 | GO REF:0000096 | actin filament                                                  |

Predicted targets of miR-1

|       |  |            |                                |                                                                                                  |
|-------|--|------------|--------------------------------|--------------------------------------------------------------------------------------------------|
| G6pdx |  | GO:0004345 | MGI:MGI:87492 PMID:9169132     | glucose-6-phosphate dehydrogenase activity                                                       |
| G6pdx |  | GO:0004345 | MGI:MGI:4417868 GO REF:0000096 | glucose-6-phosphate dehydrogenase activity                                                       |
| G6pdx |  | GO:0019322 | MGI:MGI:49164 PMID:1953691     | pentose biosynthetic process                                                                     |
| G6pdx |  | GO:0043231 | MGI:MGI:4417868 GO REF:0000096 | intracellular membrane-bounded organelle                                                         |
| G6pdx |  | GO:0005634 | MGI:MGI:4417868 GO REF:0000096 | nucleus                                                                                          |
| G6pdx |  | GO:0004345 | MGI:MGI:1261671 PMID:9627357   | glucose-6-phosphate dehydrogenase activity                                                       |
| G6pdx |  | GO:0043249 | MGI:MGI:4834177 GO REF:0000096 | erythrocyte maturation                                                                           |
| G6pdx |  | GO:0006741 | MGI:MGI:49164 PMID:1953691     | NADP biosynthetic process                                                                        |
| G6pdx |  | GO:0006741 | MGI:MGI:1349468 PMID:3377761   | NADP biosynthetic process                                                                        |
| G6pdx |  | GO:0019322 | MGI:MGI:3694178 PMID:15998684  | pentose biosynthetic process                                                                     |
| G6pdx |  | GO:0005975 | MGI:MGI:1354194 GO REF:0000004 | carbohydrate metabolic process                                                                   |
| G6pdx |  | GO:0004345 | MGI:MGI:581777 PMID:3243423    | glucose-6-phosphate dehydrogenase activity                                                       |
| G6pdx |  | GO:0009051 | MGI:MGI:4417868 GO REF:0000096 | pentose-phosphate shunt, oxidative branch                                                        |
| G6pdx |  | GO:0042802 | MGI:MGI:4834177 GO REF:0000096 | identical protein binding                                                                        |
| G6pdx |  | GO:0051156 | MGI:MGI:4834177 GO REF:0000096 | glucose 6-phosphate metabolic process                                                            |
| G6pdx |  | GO:0006741 | MGI:MGI:1202104 PMID:9539108   | NADP biosynthetic process                                                                        |
| G6pdx |  | GO:0005737 | MGI:MGI:4834177 GO REF:0000096 | cytoplasm                                                                                        |
| G6pdx |  | GO:0009051 | MGI:MGI:4834177 GO REF:0000096 | pentose-phosphate shunt, oxidative branch                                                        |
| G6pdx |  | GO:0006979 | MGI:MGI:3581936 PMID:15817708  | response to oxidative stress                                                                     |
| G6pdx |  | GO:0019322 | MGI:MGI:1202104 PMID:9539108   | pentose biosynthetic process                                                                     |
| G6pdx |  | GO:0019322 | MGI:MGI:1097071 PMID:9330624   | pentose biosynthetic process                                                                     |
| G6pdx |  | GO:0050661 | MGI:MGI:4417868 GO REF:0000096 | NADP binding                                                                                     |
| G6pdx |  | GO:0051114 | MGI:MGI:2387962 PMID:7489710   | oxidation-reduction process                                                                      |
| G6pdx |  | GO:0004345 | MGI:MGI:54095 PMID:943046      | glucose-6-phosphate dehydrogenase activity                                                       |
| G6pdx |  | GO:0006741 | MGI:MGI:2387959 PMID:10627286  | NADP biosynthetic process                                                                        |
| G6pdx |  | GO:0045471 | MGI:MGI:4417868 GO REF:0000096 | response to ethanol                                                                              |
| G6pdx |  | GO:0006979 | MGI:MGI:2387959 PMID:10627286  | response to oxidative stress                                                                     |
| G6pdx |  | GO:0004345 | MGI:MGI:53579 PMID:5764873     | glucose-6-phosphate dehydrogenase activity                                                       |
| G6pdx |  | GO:0032613 | MGI:MGI:3581936 PMID:15817708  | interleukin-12 production                                                                        |
| G6pdx |  | GO:0006740 | MGI:MGI:4834177 GO REF:0000096 | NADPH regeneration                                                                               |
| G6pdx |  | GO:0006741 | MGI:MGI:1261671 PMID:9627357   | NADP biosynthetic process                                                                        |
| G6pdx |  | GO:0004345 | MGI:MGI:49164 PMID:1953691     | glucose-6-phosphate dehydrogenase activity                                                       |
| G6pdx |  | GO:0006741 | MGI:MGI:3607389 PMID:14757696  | NADP biosynthetic process                                                                        |
| G6pdx |  | GO:0006979 | MGI:MGI:2387962 PMID:7489710   | response to oxidative stress                                                                     |
| G6pdx |  | GO:0006979 | MGI:MGI:3607389 PMID:14757696  | response to oxidative stress                                                                     |
| G6pdx |  | GO:0004345 | MGI:MGI:1349468 PMID:3377761   | glucose-6-phosphate dehydrogenase activity                                                       |
| G6pdx |  | GO:0019322 | MGI:MGI:1261671 PMID:9627357   | pentose biosynthetic process                                                                     |
| G6pdx |  | GO:0034599 | MGI:MGI:4834177 GO REF:0000096 | cellular response to oxidative stress                                                            |
| G6pdx |  | GO:0004345 | MGI:MGI:3607389 PMID:14757696  | glucose-6-phosphate dehydrogenase activity                                                       |
| G6pdx |  | GO:0006741 | MGI:MGI:3522057 PMID:15271799  | NADP biosynthetic process                                                                        |
| G6pdx |  | GO:0009898 | MGI:MGI:4834177 GO REF:0000096 | cytoplasmic side of plasma membrane                                                              |
| G6pdx |  | GO:0070062 | MGI:MGI:4834177 GO REF:0000096 | extracellular vesicular exosome                                                                  |
| G6pdx |  | GO:0004345 | MGI:MGI:3522057 PMID:15271799  | glucose-6-phosphate dehydrogenase activity                                                       |
| G6pdx |  | GO:0002033 | MGI:MGI:3694178 PMID:15998684  | vasodilation by angiotensin involved in regulation of systemic arterial blood pressure           |
| G6pdx |  | GO:0006979 | MGI:MGI:3527298 PMID:14751857  | response to oxidative stress                                                                     |
| G6pdx |  | GO:0004345 | MGI:MGI:4834177 GO REF:0000096 | glucose-6-phosphate dehydrogenase activity                                                       |
| G6pdx |  | GO:0006006 | MGI:MGI:1354194 GO REF:0000004 | glucose metabolic process                                                                        |
| G6pdx |  | GO:0004345 | MGI:MGI:61105 PMID:8491670     | glucose-6-phosphate dehydrogenase activity                                                       |
| G6pdx |  | GO:0016491 | MGI:MGI:1354194 GO REF:0000004 | oxidoreductase activity                                                                          |
| G6pdx |  | GO:0006741 | MGI:MGI:85983 PMID:9067418     | NADP biosynthetic process                                                                        |
| G6pdx |  | GO:0050661 | MGI:MGI:4834177 GO REF:0000096 | NADP binding                                                                                     |
| G6pdx |  | GO:0001998 | MGI:MGI:3694178 PMID:15998684  | angiotensin mediated vasoconstriction involved in regulation of systemic arterial blood pressure |
| G6pdx |  | GO:0004345 | MGI:MGI:2387962 PMID:7489710   | glucose-6-phosphate dehydrogenase activity                                                       |
| G6pdx |  | GO:0042803 | MGI:MGI:87492 PMID:9169132     | protein homodimerization activity                                                                |
| G6pdx |  | GO:0019322 | MGI:MGI:4834177 GO REF:0000096 | pentose biosynthetic process                                                                     |
| G6pdx |  | GO:0004345 | MGI:MGI:3527298 PMID:14751857  | glucose-6-phosphate dehydrogenase activity                                                       |
| G6pdx |  | GO:0005815 | MGI:MGI:4834177 GO REF:0000096 | microtubule organizing center                                                                    |
| G6pdx |  | GO:0006749 | MGI:MGI:2449252 PMID:12521604  | glutathione metabolic process                                                                    |
| G6pdx |  | GO:0043231 | MGI:MGI:4834177 GO REF:0000096 | intracellular membrane-bounded organelle                                                         |
| G6pdx |  | GO:0004345 | MGI:MGI:1097071 PMID:9330624   | glucose-6-phosphate dehydrogenase activity                                                       |
| G6pdx |  | GO:0040014 | MGI:MGI:2387959 PMID:10627286  | regulation of multicellular organism growth                                                      |
| G6pdx |  | GO:0006006 | MGI:MGI:2152098 GO REF:0000002 | glucose metabolic process                                                                        |
| G6pdx |  | GO:0006098 | MGI:MGI:4834177 GO REF:0000096 | pentose-phosphate shunt                                                                          |
| G6pdx |  | GO:0006741 | MGI:MGI:87492 PMID:9169132     | NADP biosynthetic process                                                                        |
| G6pdx |  | GO:0051114 | MGI:MGI:4834177 GO REF:0000096 | oxidation-reduction process                                                                      |
| G6pdx |  | GO:0004345 | MGI:MGI:3054313 PMID:15155459  | glucose-6-phosphate dehydrogenase activity                                                       |
| G6pdx |  | GO:0001816 | MGI:MGI:4834177 GO REF:0000096 | cytokine production                                                                              |
| G6pdx |  | GO:0048821 | MGI:MGI:3527298 PMID:14751857  | erythrocyte development                                                                          |
| G6pdx |  | GO:0004345 | MGI:MGI:2449252 PMID:12521604  | glucose-6-phosphate dehydrogenase activity                                                       |
| G6pdx |  | GO:0010734 | MGI:MGI:4834177 GO REF:0000096 | negative regulation of protein glutathionylation                                                 |
| G6pdx |  | GO:0019322 | MGI:MGI:3607389 PMID:14757696  | pentose biosynthetic process                                                                     |
| G6pdx |  | GO:0006749 | MGI:MGI:4834177 GO REF:0000096 | glutathione metabolic process                                                                    |
| G6pdx |  | GO:0006741 | MGI:MGI:1097071 PMID:9330624   | NADP biosynthetic process                                                                        |
| G6pdx |  | GO:0004345 | MGI:MGI:2387959 PMID:10627286  | glucose-6-phosphate dehydrogenase activity                                                       |
| G6pdx |  | GO:0006741 | MGI:MGI:54902 PMID:7439685     | NADP biosynthetic process                                                                        |
| G6pdx |  | GO:0046390 | MGI:MGI:4834177 GO REF:0000096 | ribose phosphate biosynthetic process                                                            |
| G6pdx |  | GO:0042803 | MGI:MGI:4834177 GO REF:0000096 | protein homodimerization activity                                                                |
| G6pdx |  | GO:0043523 | MGI:MGI:4417868 GO REF:0000096 | regulation of neuron apoptotic process                                                           |
| G6pdx |  | GO:0004345 | MGI:MGI:1202104 PMID:9539108   | glucose-6-phosphate dehydrogenase activity                                                       |
| G6pdx |  | GO:0048821 | MGI:MGI:3522057 PMID:15271799  | erythrocyte development                                                                          |
| G6pdx |  | GO:0006739 | MGI:MGI:4834177 GO REF:0000096 | NADP metabolic process                                                                           |
| G6pdx |  | GO:0001816 | MGI:MGI:3581936 PMID:15817708  | cytokine production                                                                              |
| G6pdx |  | GO:0004345 | MGI:MGI:3694178 PMID:15998684  | glucose-6-phosphate dehydrogenase activity                                                       |
| G6pdx |  | GO:0006098 | MGI:MGI:4417868 GO REF:0000096 | pentose-phosphate shunt                                                                          |
| G6pdx |  | GO:0030246 | MGI:MGI:4417868 GO REF:0000096 | carbohydrate binding                                                                             |
| G6pdx |  | GO:0032613 | MGI:MGI:3581936 PMID:15817708  | interleukin-10 production                                                                        |
| G6pdx |  | GO:0005813 | MGI:MGI:4834177 GO REF:0000096 | centrosome                                                                                       |
| G6pdx |  | GO:0004345 | MGI:MGI:85983 PMID:9067418     | glucose-6-phosphate dehydrogenase activity                                                       |
| G6pdx |  | GO:0016020 | MGI:MGI:4834177 GO REF:0000096 | membrane                                                                                         |
| G6pdx |  | GO:0006741 | MGI:MGI:3694178 PMID:15998684  | NADP biosynthetic process                                                                        |
| G6pdx |  | GO:0005829 | MGI:MGI:4417868 GO REF:0000096 | cytosol                                                                                          |
| G6pdx |  | GO:0005536 | MGI:MGI:4417868 GO REF:0000096 | glucose binding                                                                                  |
| G6pdx |  | GO:0051156 | MGI:MGI:4417868 GO REF:0000096 | glucose 6-phosphate metabolic process                                                            |
| G6pdx |  | GO:0005536 | MGI:MGI:4834177 GO REF:0000096 | glucose binding                                                                                  |
| G6pdx |  | GO:0006979 | MGI:MGI:3694178 PMID:15998684  | response to oxidative stress                                                                     |
| G6pdx |  | GO:0006695 | MGI:MGI:4834177 GO REF:0000096 | cholesterol biosynthetic process                                                                 |
| G6pdx |  | GO:0004345 | MGI:MGI:54902 PMID:7439685     | glucose-6-phosphate dehydrogenase activity                                                       |
| G6pdx |  | GO:0019322 | MGI:MGI:54902 PMID:7439685     | pentose biosynthetic process                                                                     |
| G6pdx |  | GO:0005829 | MGI:MGI:4834177 GO REF:0000096 | cytosol                                                                                          |
| G6pdx |  | GO:0019322 | MGI:MGI:61105 PMID:8491670     | pentose biosynthetic process                                                                     |

Predicted targets of miR-1

|          |  |            |                 |                |                                                                                                  |
|----------|--|------------|-----------------|----------------|--------------------------------------------------------------------------------------------------|
| H3f3b    |  | GO:1902340 | MGi:MGi:5502235 | PMID:23903189  | negative regulation of chromosome condensation                                                   |
| H3f3b    |  | GO:0000980 | MGi:MGi:4834177 | GO REF:0000096 | RNA polymerase II distal enhancer sequence-specific DNA binding                                  |
| H3f3b    |  | GO:0006997 | MGi:MGi:5474379 | PMID:23570311  | nucleus organization                                                                             |
| H3f3b    |  | GO:0001649 | MGi:MGi:5430686 | PMID:22705305  | osteoblast differentiation                                                                       |
| H3f3b    |  | GO:0043234 | MGi:MGi:4834177 | GO REF:0000096 | protein complex                                                                                  |
| H3f3b    |  | GO:0005634 | MGi:MGi:4834177 | GO REF:0000096 | nucleus                                                                                          |
| H3f3b    |  | GO:0042692 | MGi:MGi:5430686 | PMID:22705305  | muscle cell differentiation                                                                      |
| H3f3b    |  | GO:0000979 | MGi:MGi:4834177 | GO REF:0000096 | RNA polymerase II core promoter sequence-specific DNA binding                                    |
| H3f3b    |  | GO:0000788 | MGi:MGi:4834177 | GO REF:0000096 | nuclear nucleosome                                                                               |
| H3f3b    |  | GO:0070062 | MGi:MGi:4834177 | GO REF:0000096 | extracellular vesicular exosome                                                                  |
| H3f3b    |  | GO:0031492 | MGi:MGi:4834177 | GO REF:0000096 | nucleosomal DNA binding                                                                          |
| H3f3b    |  | GO:0005634 | MGi:MGi:5474379 | PMID:23570311  | nucleus                                                                                          |
| H3f3b    |  | GO:0000228 | MGi:MGi:4834177 | GO REF:0000096 | nuclear chromosome                                                                               |
| H3f3b    |  | GO:0090230 | MGi:MGi:5474379 | PMID:23570311  | regulation of centromere complex assembly                                                        |
| Serp1    |  | GO:0001501 | MGi:MGi:3619104 | PMID:16415102  | <b>skeletal system development</b>                                                               |
| Serp1    |  | GO:0045727 | MGi:MGi:3619104 | PMID:16415102  | positive regulation of translation                                                               |
| Serp1    |  | GO:0015031 | MGi:MGi:1354194 | GO REF:0000004 | protein transport                                                                                |
| Serp1    |  | GO:0030968 | MGi:MGi:3619104 | PMID:16415102  | endoplasmic reticulum unfolded protein response                                                  |
| Serp1    |  | GO:0006486 | MGi:MGi:4417868 | GO REF:0000096 | protein glycosylation                                                                            |
| Serp1    |  | GO:0009791 | MGi:MGi:3629369 | PMID:16705175  | post-embryonic development                                                                       |
| Serp1    |  | GO:0032024 | MGi:MGi:3619104 | PMID:16415102  | positive regulation of insulin secretion                                                         |
| Serp1    |  | GO:0006006 | MGi:MGi:3619104 | PMID:16415102  | glucose metabolic process                                                                        |
| Serp1    |  | GO:0010259 | MGi:MGi:3629369 | PMID:16705175  | multicellular organismal aging                                                                   |
| Serp1    |  | GO:0005783 | MGi:MGi:2152098 | GO REF:0000002 | endoplasmic reticulum                                                                            |
| Serp1    |  | GO:0016020 | MGi:MGi:1354194 | GO REF:0000004 | membrane                                                                                         |
| Serp1    |  | GO:0006810 | MGi:MGi:1354194 | GO REF:0000004 | transport                                                                                        |
| Serp1    |  | GO:0048644 | MGi:MGi:3619104 | PMID:16415102  | <b>muscle organ morphogenesis</b>                                                                |
| Serp1    |  | GO:0046622 | MGi:MGi:3619104 | PMID:16415102  | positive regulation of organ growth                                                              |
| Serp1    |  | GO:0005881 | MGi:MGi:4834177 | GO REF:0000096 | <b>cytoplasmic microtubule</b>                                                                   |
| Serp1    |  | GO:0016021 | MGi:MGi:1354194 | GO REF:0000004 | integral component of membrane                                                                   |
| Serp1    |  | GO:0060124 | MGi:MGi:3619104 | PMID:16415102  | positive regulation of growth hormone secretion                                                  |
| Serp1    |  | GO:0005783 | MGi:MGi:1354194 | GO REF:0000004 | endoplasmic reticulum                                                                            |
| Sh3bgrl3 |  | GO:0045454 | MGi:MGi:2152098 | GO REF:0000002 | cell redox homeostasis                                                                           |
| Sh3bgrl3 |  | GO:0030834 | MGi:MGi:4834177 | GO REF:0000096 | <b>regulation of actin filament depolymerization</b>                                             |
| Sh3bgrl3 |  | GO:0032956 | MGi:MGi:4834177 | GO REF:0000096 | <b>regulation of actin cytoskeleton organization</b>                                             |
| Sh3bgrl3 |  | GO:0005634 | MGi:MGi:1354194 | GO REF:0000004 | nucleus                                                                                          |
| Sh3bgrl3 |  | GO:0005100 | MGi:MGi:4834177 | GO REF:0000096 | Rho GTPase activator activity                                                                    |
| Sh3bgrl3 |  | GO:0009055 | MGi:MGi:2152098 | GO REF:0000002 | electron carrier activity                                                                        |
| Sh3bgrl3 |  | GO:0030027 | MGi:MGi:4834177 | GO REF:0000096 | lamellipodium                                                                                    |
| Sh3bgrl3 |  | GO:0030215 | MGi:MGi:4834177 | GO REF:0000096 | semaphorin receptor binding                                                                      |
| Sh3bgrl3 |  | GO:0005737 | MGi:MGi:1354194 | GO REF:0000004 | cytoplasm                                                                                        |
| Sh3bgrl3 |  | GO:0032321 | MGi:MGi:4834177 | GO REF:0000096 | positive regulation of Rho GTPase activity                                                       |
| Sh3bgrl3 |  | GO:0043535 | MGi:MGi:4834177 | GO REF:0000096 | regulation of blood vessel endothelial cell migration                                            |
| Sh3bgrl3 |  | GO:0015035 | MGi:MGi:2152098 | GO REF:0000002 | protein disulfide oxidoreductase activity                                                        |
| Sh3bgrl3 |  | GO:0070062 | MGi:MGi:4834177 | GO REF:0000096 | extracellular vesicular exosome                                                                  |
| Zfp36l2  |  | GO:1900153 | MGi:MGi:5320815 | PMID:22367205  | positive regulation of nuclear-transcribed mRNA catabolic process, deadenylation-dependent decay |
| Zfp36l2  |  | GO:0043488 | MGi:MGi:3511379 | PMID:15467755  | regulation of mRNA stability                                                                     |
| Zfp36l2  |  | GO:0035925 | MGi:MGi:5500826 | PMID:23748442  | mRNA 3'-UTR AU-rich region binding                                                               |
| Zfp36l2  |  | GO:2000737 | MGi:MGi:5500826 | PMID:23748442  | negative regulation of stem cell differentiation                                                 |
| Zfp36l2  |  | GO:0003723 | MGi:MGi:1354194 | GO REF:0000004 | RNA binding                                                                                      |
| Zfp36l2  |  | GO:0003677 | MGi:MGi:1354194 | GO REF:0000004 | DNA binding                                                                                      |
| Zfp36l2  |  | GO:0017091 | MGi:MGi:4834177 | GO REF:0000096 | AU-rich element binding                                                                          |
| Zfp36l2  |  | GO:0046872 | MGi:MGi:2152098 | GO REF:0000002 | metal ion binding                                                                                |
| Zfp36l2  |  | GO:0006402 | MGi:MGi:5320815 | PMID:22367205  | mRNA catabolic process                                                                           |
| Zfp36l2  |  | GO:0005634 | MGi:MGi:5320815 | PMID:22367205  | nucleus                                                                                          |
| Zfp36l2  |  | GO:0044822 | MGi:MGi:4834177 | GO REF:0000096 | poly(A) RNA binding                                                                              |
| Zfp36l2  |  | GO:0035925 | MGi:MGi:5320815 | PMID:22367205  | mRNA 3'-UTR AU-rich region binding                                                               |
| Zfp36l2  |  | GO:0005737 | MGi:MGi:2177366 | PMID:11796723  | cytoplasm                                                                                        |
| Zfp36l2  |  | GO:0030097 | MGi:MGi:5500826 | PMID:23748442  | hemopoiesis                                                                                      |
| Zfp36l2  |  | GO:0033077 | MGi:MGi:4818820 | PMID:20622884  | T cell differentiation in thymus                                                                 |
| Zfp36l2  |  | GO:0000288 | MGi:MGi:3589099 | PMID:15814898  | nuclear-transcribed mRNA catabolic process, deadenylation-dependent decay                        |
| Zfp36l2  |  | GO:0005634 | MGi:MGi:2177366 | PMID:11796723  | nucleus                                                                                          |
| Zfp36l2  |  | GO:0035019 | MGi:MGi:5500826 | PMID:23748442  | somatic stem cell maintenance                                                                    |
| Zfp36l2  |  | GO:0005737 | MGi:MGi:5320815 | PMID:22367205  | cytoplasm                                                                                        |
| Zfp36l2  |  | GO:0046872 | MGi:MGi:1354194 | GO REF:0000004 | metal ion binding                                                                                |
| Zfp36l2  |  | GO:0048103 | MGi:MGi:5500826 | PMID:23748442  | somatic stem cell division                                                                       |
| Zfp36l2  |  | GO:0060216 | MGi:MGi:4360416 | PMID:19633199  | definitive hemopoiesis                                                                           |
| Zfp36l2  |  | GO:0030097 | MGi:MGi:4360416 | PMID:19633199  | hemopoiesis                                                                                      |

Predicted targets of miR-378

| Gene product | Reference  | Reference       | Reference      | Direct annotation                                               |
|--------------|------------|-----------------|----------------|-----------------------------------------------------------------|
| H3f3b        | GO:1902340 | MGI:MGI:5502235 | PMID:23903189  | negative regulation of chromosome condensation                  |
| H3f3b        | GO:000980  | MGI:MGI:4834177 | GO_REF:0000096 | RNA polymerase II distal enhancer sequence-specific DNA binding |
| H3f3b        | GO:0006997 | MGI:MGI:5474379 | PMID:23570311  | nucleus organization                                            |
| H3f3b        | GO:0001649 | MGI:MGI:5430686 | PMID:22705305  | osteoblast differentiation                                      |
| H3f3b        | GO:0043234 | MGI:MGI:4834177 | GO_REF:0000096 | protein complex                                                 |
| H3f3b        | GO:0005634 | MGI:MGI:4834177 | GO_REF:0000096 | nucleus                                                         |
| H3f3b        | GO:0042692 | MGI:MGI:5430686 | PMID:22705305  | <b>muscle cell differentiation</b>                              |
| H3f3b        | GO:0000979 | MGI:MGI:4834177 | GO_REF:0000096 | RNA polymerase II core promoter sequence-specific DNA binding   |
| H3f3b        | GO:0000788 | MGI:MGI:4834177 | GO_REF:0000096 | nuclear nucleosome                                              |
| H3f3b        | GO:0070062 | MGI:MGI:4834177 | GO_REF:0000096 | extracellular vesicular exosome                                 |
| H3f3b        | GO:0031492 | MGI:MGI:4834177 | GO_REF:0000096 | nucleosomal DNA binding                                         |
| H3f3b        | GO:0005634 | MGI:MGI:5474379 | PMID:23570311  | nucleus                                                         |
| H3f3b        | GO:0000228 | MGI:MGI:4834177 | GO_REF:0000096 | nuclear chromosome                                              |
| H3f3b        | GO:0090230 | MGI:MGI:5474379 | PMID:23570311  | regulation of centromere complex assembly                       |

|      |            |                 |                |                                              |
|------|------------|-----------------|----------------|----------------------------------------------|
| Vat1 | GO:0055114 | MGI:MGI:1354194 | GO_REF:0000004 | oxidation-reduction process                  |
| Vat1 | GO:0043883 | MGI:MGI:2152096 | GO_REF:0000003 | malolactic enzyme activity                   |
| Vat1 | GO:0043826 | MGI:MGI:2152096 | GO_REF:0000003 | sulfur oxygenase reductase activity          |
| Vat1 | GO:0016020 | MGI:MGI:1354194 | GO_REF:0000004 | membrane                                     |
| Vat1 | GO:0016491 | MGI:MGI:2152098 | GO_REF:0000002 | oxidoreductase activity                      |
| Vat1 | GO:0005741 | MGI:MGI:4417868 | GO_REF:0000096 | mitochondrial outer membrane                 |
| Vat1 | GO:0070062 | MGI:MGI:4834177 | GO_REF:0000096 | extracellular vesicular exosome              |
| Vat1 | GO:0055114 | MGI:MGI:2152098 | GO_REF:0000002 | oxidation-reduction process                  |
| Vat1 | GO:0043914 | MGI:MGI:2152096 | GO_REF:0000003 | NADPH:sulfur oxidoreductase activity         |
| Vat1 | GO:0016491 | MGI:MGI:1354194 | GO_REF:0000004 | oxidoreductase activity                      |
| Vat1 | GO:0043738 | MGI:MGI:2152096 | GO_REF:0000003 | reduced coenzyme F420 dehydrogenase activity |
| Vat1 | GO:0005739 | MGI:MGI:1354194 | GO_REF:0000004 | mitochondrion                                |
| Vat1 | GO:0008270 | MGI:MGI:2152098 | GO_REF:0000002 | zinc ion binding                             |
| Vat1 | GO:0010637 | MGI:MGI:4834177 | GO_REF:0000096 | negative regulation of mitochondrial fusion  |
| Vat1 | GO:0005737 | MGI:MGI:1354194 | GO_REF:0000004 | cytoplasm                                    |
| Vat1 | GO:0052693 | MGI:MGI:2152096 | GO_REF:0000003 | epoxyqueuosine reductase activity            |
| Vat1 | GO:0008748 | MGI:MGI:2152096 | GO_REF:0000003 | N-ethylmaleimide reductase activity          |
